# Supplementary material for: Pre-stimulus phase and amplitude regulation of phase-locked responses are maximized in the critical state
Source: eLife journal article supplement (doi:10.7554/elife.53016), 2020-04-23
Supplement: supp [file elife-53016-supp-v2.zip]

Archive with 10 entries (10 files):
- elife_poa_e53016_Transparent_Reporting_File.pdf
- elife_poa_e53016_Figure_1_figure_supplement_1.pdf
- elife_poa_e53016_Figure_1_figure_supplement_2.pdf
- elife_poa_e53016_Figure_1_figure_supplement_3.pdf
- elife_poa_e53016_Figure_2_figure_supplement_1.pdf
- elife_poa_e53016_Figure_2_figure_supplement_2.pdf
- elife_poa_e53016_Figure_2_figure_supplement_3.pdf
- elife_poa_e53016_Figure_3_figure_supplement_1.pdf
- elife_poa_e53016_Figure_3_figure_supplement_2.pdf
- elife_poa_e53016_Figure_3_figure_supplement_3.pdf
