# Supplementary figures and images for: Pre-stimulus phase and amplitude regulation of phase-locked responses are maximized in the critical state
Source: eLife journal article supplement (doi:10.7554/elife.53016), 2020-04-23

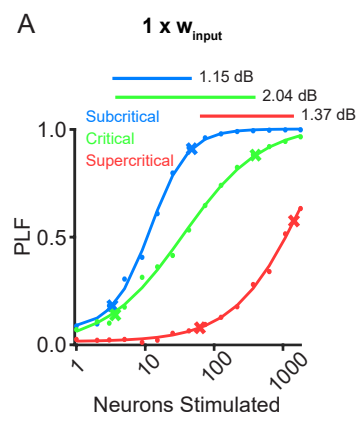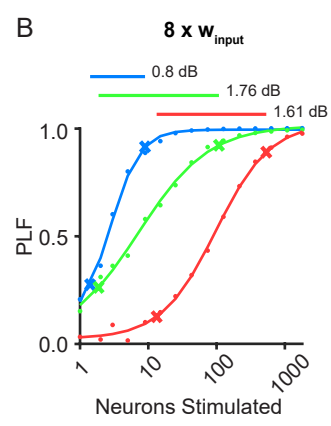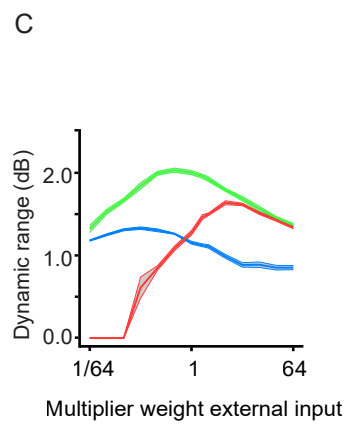

Supplement: supp [file elife-53016-supp-v1.zip]

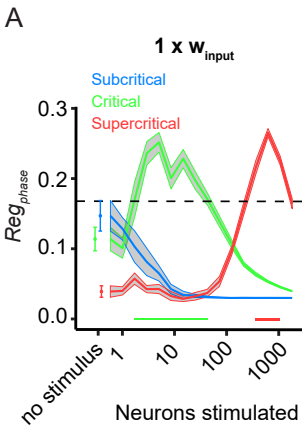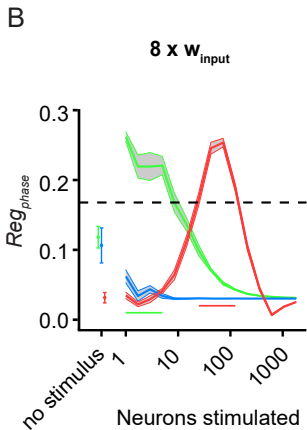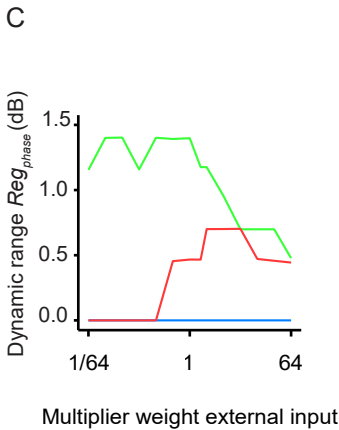

Supplement: supp [file elife-53016-supp-v1.zip]

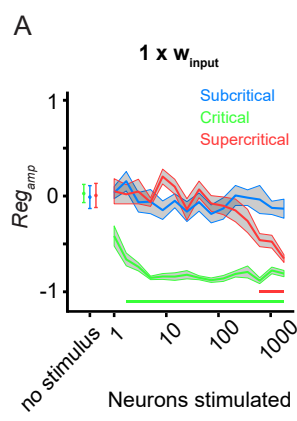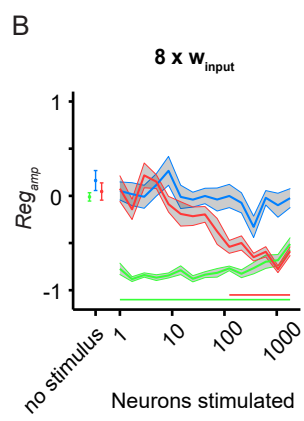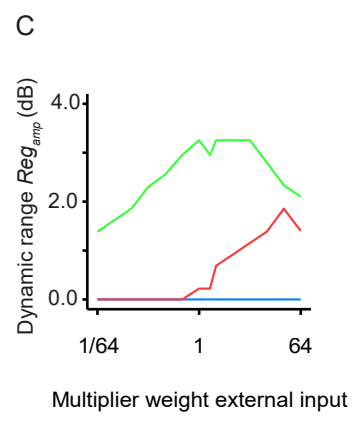

Supplement: supp [file elife-53016-supp-v1.zip]

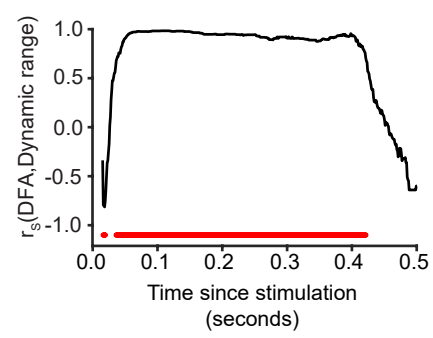

Supplement: supp [file elife-53016-supp-v1.zip]

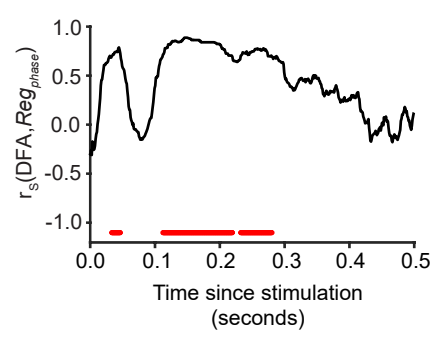

Supplement: supp [file elife-53016-supp-v1.zip]

Figure 3—figure supplement 1

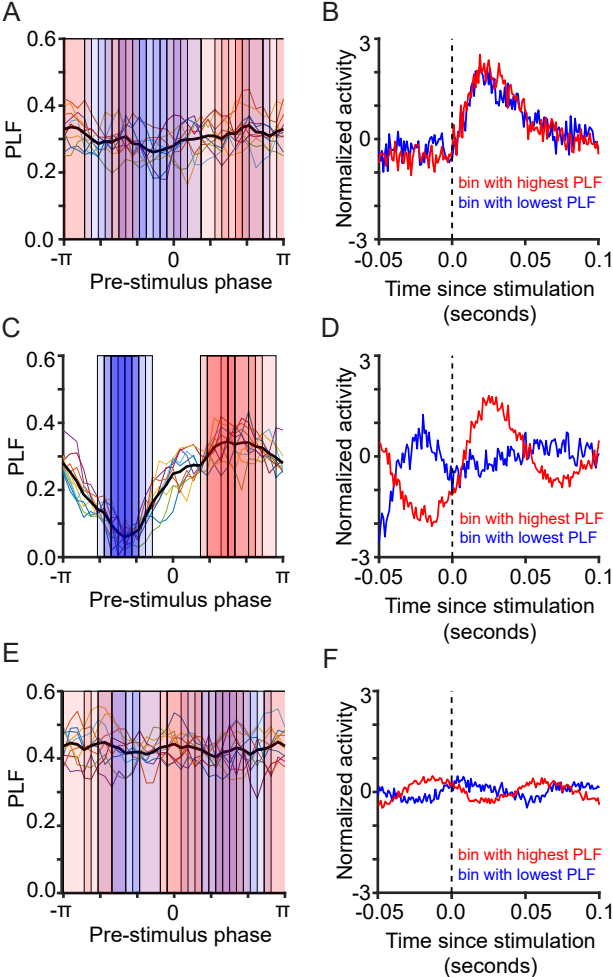

Supplement: supp [file elife-53016-supp-v1.zip]

Figure 2—figure supplement 1

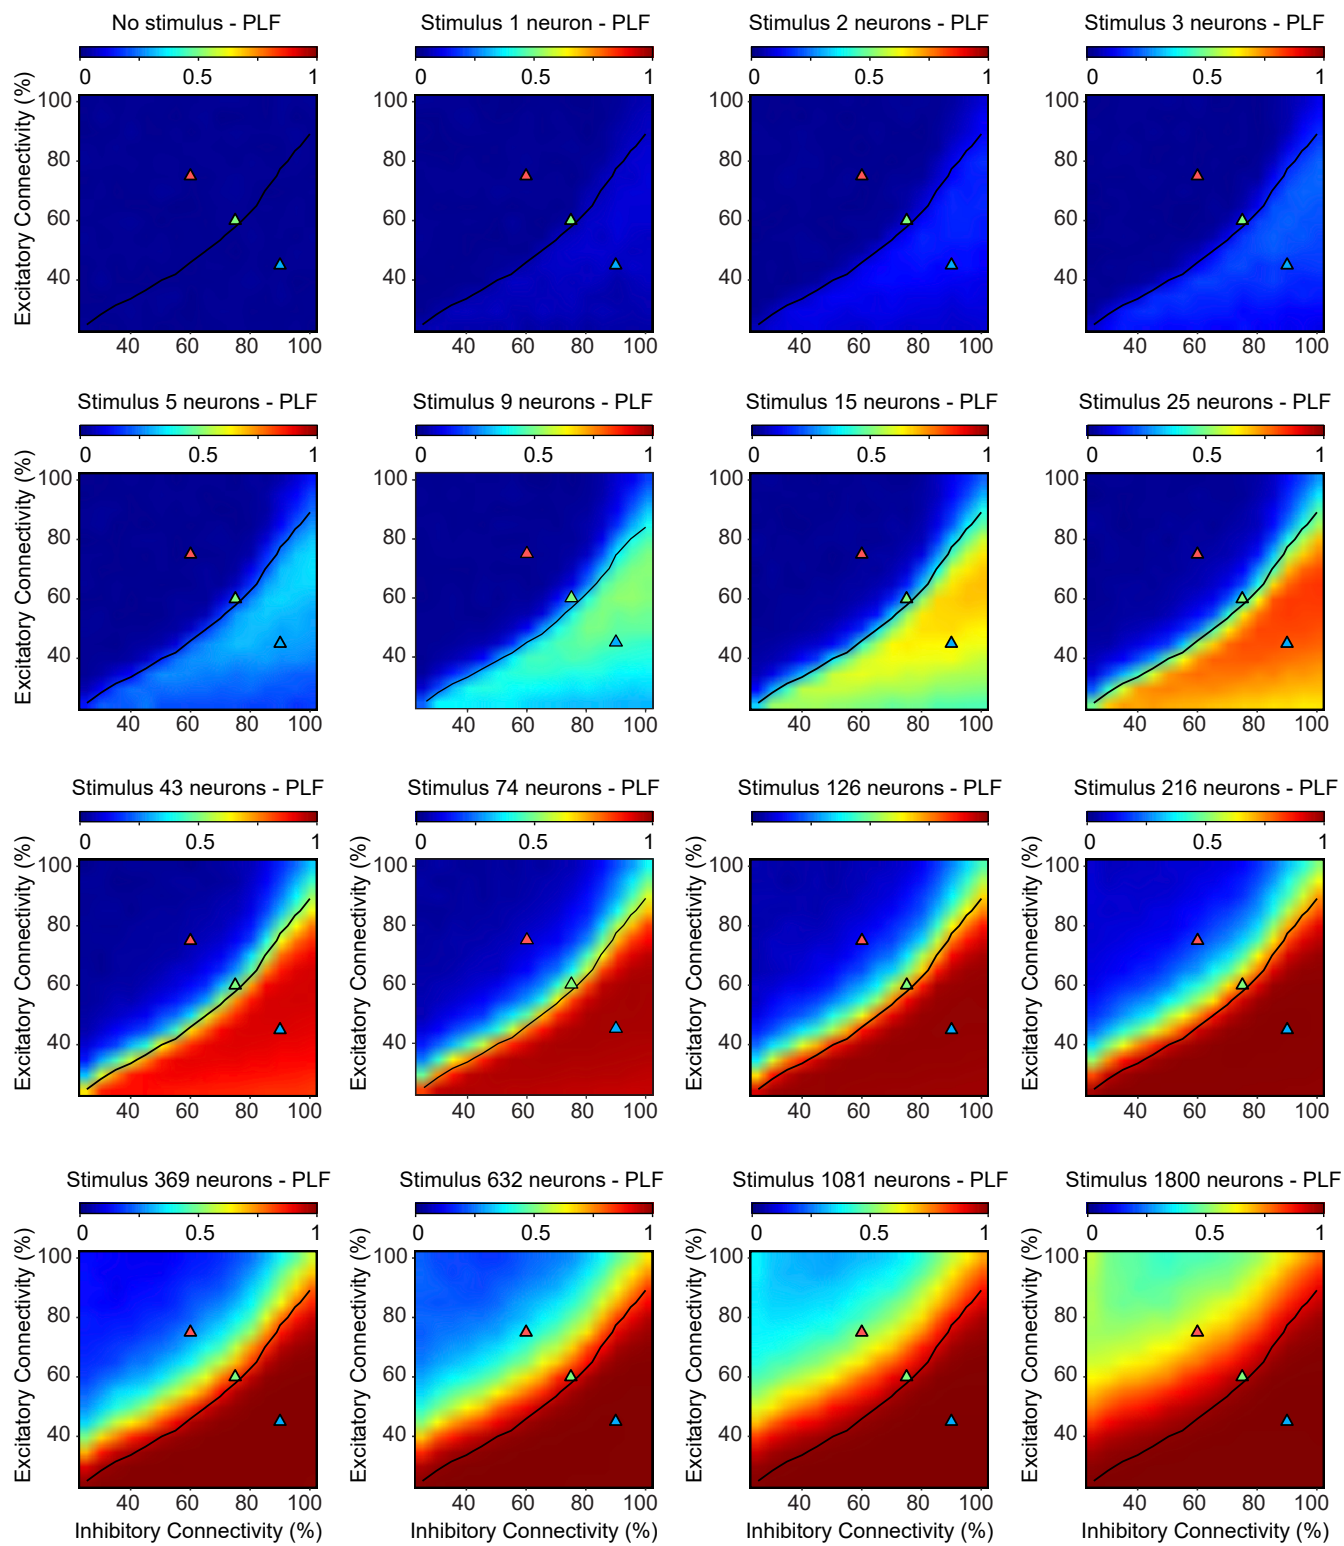

Supplement: supp [file elife-53016-supp-v1.zip]

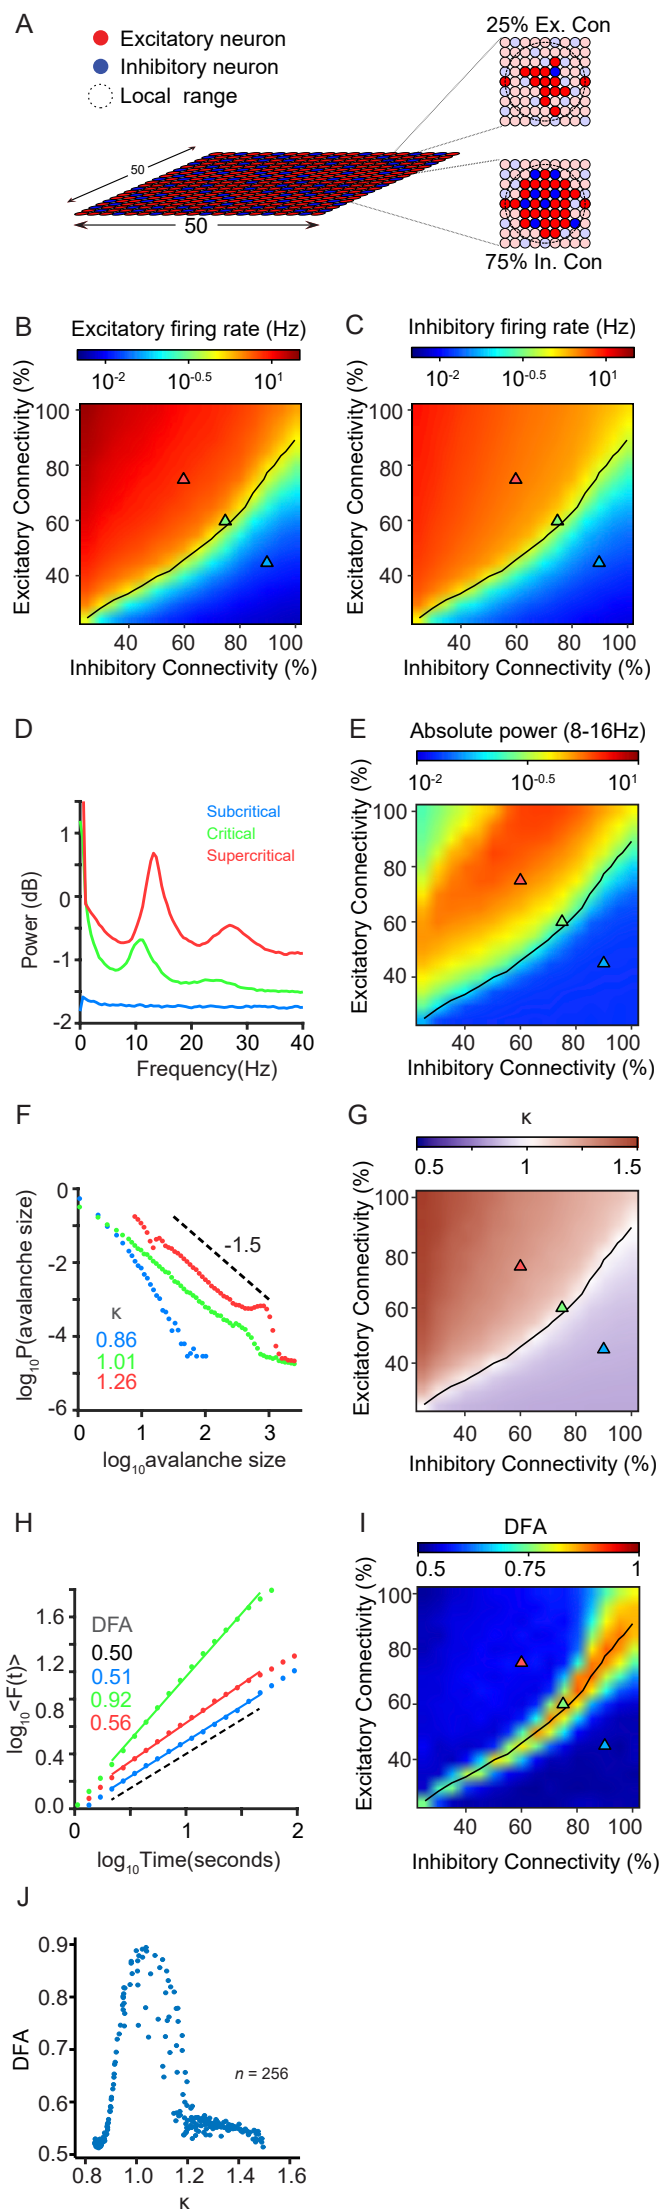

Supplement: supp [file elife-53016-supp-v1.zip]

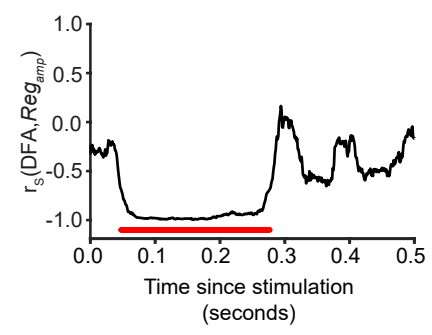

Supplement: supp [file elife-53016-supp-v1.zip]
